# Supplementary material
Source: PubMed Central journal article supplement (PMC4241193)
Supplement: NIHMS639850-supplement-01.pdf [file NIHMS639850-supplement-01.pdf]

with no effect of HSV-*FosB*-ZFP35-NFD [ $t_{12}=3.2$ ,  $*P=0.008$ ;  $n=7$ ]. **(j)** Representative heatmaps of social interaction after a subthreshold defeat stress show a preference for the interaction zone when a target mouse is present for mice injected with control virus and HSV-*FosB*-ZFP35-NFD, but not HSV-*FosB*-ZFP35-G9a.

### Supplementary Figure Legends:

**Supplementary Figure 1: A suite of *FosB*-ZFPs bidirectionally regulate *FosB* expression in vitro.** **(a)** *FosB*/ $\Delta$ *FosB* mRNA was significantly induced by several *FosB*-ZFP-p65 and -G9a constructs expressed in N2a cells and harvested after 48 hours. *FosB*-ZFP-NFD constructs activated gene expression to a lesser extent or not at all. Data are normalized to mock transfected cells. Complete statistics are available in Supplementary Table 3. Student's unpaired t-test:  $\square P<0.05$ ,  $\square P<0.10$ . Data are presented as mean  $\pm$  s.e.m.

**Supplementary Figure 2: HSV-ZFPs specifically infect neurons in NAc and inhibit basal *FosB* expression.** **(a)** HSV-GFP specifically infects DARPP-32 positive neurons in the NAc. White arrows indicate double labeled cells. **(b)** NAc injection of HSV-*FosB*-ZFP35-G9a repressed expression of *FosB*/ $\Delta$ *FosB* in HSV infected (GFP+) cells [ $t_{13}=3.55$ ,  $*P=0.033$ ;  $n=7, 8$ ] compared to HSV-*FosB*-ZFP35-G9a (72 hours post HSV injection). Data are presented as mean  $\pm$  s.e.m.

**Supplementary Figure 3: Regulation of *FosB* expression and reward behavior by *FosB*-TALEs and a suite of additional catalytic domains fused to *FosB*-ZFP35.** **(a)** Locations of

*FosB*-ZFP and -TALE binding relative to the *FosB* TSS. The location of functional SRF and CREB sites are shown. **(b)** *FosB*/ $\Delta$ *FosB* mRNA expression in the NAc was significantly induced by HSV-*FosB*-TALE2-VP64 [FosB:  $t_8=3.03$ ,  $*P=0.016$ ;  $\Delta$ FosB:  $t_8=6.40$ ,  $*P=0.000$ ;  $n=5$ ], and -*FosB*-TALE3-VP64 [FosB:  $t_8=2.79$ ,  $*P=0.023$ ;  $\Delta$ FosB:  $t_8=4.01$ ,  $*P=0.004$ ;  $n=5$ ] compared to control virus. **(c)** The binding sites of the 6-finger ZFP35 and 17-RVD (repeat variable diresidue) TALE1 recognize the *FosB* promoter at overlapping sites approximately 250 bp upstream from the *FosB* TSS. **(d)** *FosB*-ZFP35-p65 [FosB:  $t_4=5.91$ ,  $*P=0.004$ ;  $\Delta$ FosB:  $t_4=26.11$ ,  $*P=0.000$ ;  $n=3$ ], -p65x2 [FosB:  $t_4=2.30$ ,  $*P=0.000$ ;  $\Delta$ FosB:  $t_4=3.46$ ,  $*P=0.026$ ;  $n=3$ ], -VP16 [FosB:  $t_4=9.04$ ,  $*P=0.001$ ;  $\Delta$ FosB:  $t_4=7.45$ ,  $*P=0.002$ ;  $n=3$ ], and -VP64 [FosB:  $t_4=19.40$ ,  $*P=0.001$ ;  $\Delta$ FosB:  $t_4=7.45$ ,  $*P=0.001$ ;  $n=3$ ] and *FosB*-TALE1-VP64 [FosB:  $t_4=6.80$ ,  $*P=0.002$ ;  $\Delta$ FosB:  $t_4=15.17$ ,  $*P=0.000$ ;  $n=3$ ] activate *FosB*/ $\Delta$ *FosB* mRNA levels when expressed in Neuro2a cells and harvested after 48 hours. Data are normalized to mock transfected cells. **(e)** HSV-*FosB*-TALE1-VP64 in NAc sensitizes cocaine-induced hyperactivity over time. There is a significant interaction between day, cocaine treatment, and virus [ $F(3,32)=3.42$ ,  $*P=0.029$ ]. TALE1-VP64 sensitizes the effect of cocaine on locomotor activity [main effect of day among TALE1-VP64 [ $F(3,35)=9.92$ ,  $*P=0.000$ ,  $n=10$ ], but not GFP control [ $F(3,36)=2.05$ ,  $P=0.126$ ,  $n=9$ ]. HSV-GFP data are the same as in Fig. 4d-e. Heat maps show representative locomotor data within the chamber for mice over the course of repeated cocaine exposure. Data are presented as mean  $\pm$  s.e.m.

**Supplementary Figure 4. Differential regulation by *FosB*-ZFPs in vitro and in vivo. (a)** Expression of *FosB*-ZFP35-G9a differs between N2a cells and NAc [ $t_6=4.50$ ,  $*P=0.004$ ;  $n=3,5$ ]. **(b)** Titration of the amount of *FosB*-ZFP35-G9a expression in N2a cells leads to a reduction in

the amount of induced mRNA expression of  $\Delta$ FosB but not FosB. Using a 2-tailed Pearson correlation, we found a significant correlation between  $\mu$ g of transfected DNA and mRNA fold change of  $\Delta$ FosB [ $R_{12}=0.83$ ,  $*P=0.001$ ] but not FosB [ $R_{12}=.66$ ,  $P=0.665$ ]. Data are presented as mean  $\pm$  s.e.m.

**Supplementary Figure 5: Full blots of experiment shown in Figure 1e.**

**Methods:**

**Animals and treatments.** Male 7-8 week old C57BL/6J mice and 6-month old CD1 retired breeders (CD1 aggressor) were housed at 22-25°C in a 12-hr light/dark cycle and provided food and water ad libitum. Animals were housed five per cage and habituated in our facility for at least 1 week before experimentation and all tests were conducted during the light cycle. Members of the same cage were randomly assigned to different experimental groups for behavioral studies and the order of testing was distributed across groups. Wherever possible, the experimenter conducting the data analysis was blind to treatment conditions of the animals. All experiments were conducted in accordance with the guidelines of the Institutional Animal Care and Use Committee at Mount Sinai. Group size determination was based on published protocols for the behavioral paradigm in use; no statistical test was used to predetermine sample size. For repeated cocaine experiments (immunohistochemistry, chromatin immunoprecipitation [ChIP]), animals received daily injections of either saline (5 treatments saline, i.p.), or saline followed by cocaine (1 treatment saline, 4 treatments cocaine, 20 mg/kg, i.p.) and sacrificed 24 hours after the

**Supplementary Table 1: Primers**

**Mus qRT-PCR Primers**

| Name          | Sequence                  |
|---------------|---------------------------|
| Ankrd52 F1    | CCTCTGACACCTACCGGAGA      |
| Ankrd52 R1    | TCGAGGTTCTGTCTGTTGCC      |
| Cacnb3 F1     | CAGCTACTGTGGGGTTCTGG      |
| Cacnb3 R1     | CTCCTGGCCTTCTGTTCCCTG     |
| cFos F        | GGAATTAACCTGGTGCTGGA      |
| cFos R        | TGAACATGGACGCTGAAGAG      |
| Ctbs F1       | TCCGAGATGCCTGTGACTTT      |
| Ctbs R1       | GCCAGCAGGATCCTTTGAGAG     |
| Cux2 F1       | TCCAGGGTCTTCCGGACATC      |
| Cux2 R1       | CCGAGGCGACAGAACTAAGC      |
| D15Wsu169e F1 | GAGACCCAGGACGTGAAGC       |
| D15Wsu169e R1 | CATCAGGTTGCCTCCTCCAG      |
| ΔFosB F       | AGGCAGAGCTGGAGTCGGAGAT    |
| ΔFosB R       | GCCGAGGACTTGAACCTCACTCG   |
| Dip2b F1      | CTCCTCTTCTCACTTCGCC       |
| Dip2b R1      | GTTGGGATCTGGCTGAGGTAT     |
| FosB F        | GTGAGAGATTTGCCAGGGTC      |
| FosB R        | AGAGAGAAGCCGTCAGGTTG      |
| Fsd1l F1      | GCAAGTCCCAGGAGTTACAG      |
| Fsd1l R1      | CTCTTTACAGCATCAGAAATGACAA |
| Gnai1 F1      | ATGGGCTGCACATTGAGCG       |
| Gnai1 R1      | TGCTGTAGACCACTGCCTTG      |
| Hcfc2 F1      | ATGTACAGTGACTGCTGGGC      |
| Hcfc2 R1      | ACCATGGGCCACATCTTTT       |
| Hic2 F1       | TGCTCACATGGTTTCTGGGC      |
| Hic2 R1       | AGCAGCCAGGACATTCTTGT      |
| Kcnt1 F1      | GGTGTGTGACGCCAAGAT        |
| Kcnt1 R1      | CGGGGATGGGCATAGAATC       |
| Mef2b F1      | GGGATTGGGCACCTCAAGAA      |
| Mef2b F2      | GTCTACAGCGTCCCTCGTTG      |
| Ofcc1 F1      | CACTGCAGACGGGAATCCTT      |
| Ofcc1 R1      | TTGACACTCCTGTGAGGCAC      |
| Prrt1 F1      | CGTGCCTGCTTATGTCCCT       |
| Prrt1 R1      | AGAAGCAGCAGATGGTGGTC      |
| Prrt2 F1      | GCCTTCGCTTATGCCGTC        |
| Prrt2 R1      | CCCAAGACAGCTCCCAACAG      |
| Pth1r F1      | CTGTGGGGCTTACCATCTT       |
| Pth1r R1      | TCCCGAAGCTTAGTGGCAAG      |
| Ptprn2 F1     | TCCGCCACAACCTCACACTAC     |
| Ptprn2 R1     | GAGCCGAAGGACTAGGCATC      |
| Pygo1 F1      | TGGGTTAGGAGGGCCCAATA      |
| Pygo1 R1      | TGTCATCGAACGGATTGGCA      |
| Rps6ka5 F1    | TCAGGTTCCCTAAGAGCGA       |
| Rps6ka5 R1    | CCTTCTCTGCGTGTCTGTT       |
| Sardh F1      | CTTGGGCCAGCAGCATTG        |
| Sardh R1      | GGGACTTAGGGCTCCTGTA       |

**Mus qRT-PCR Primers (continued)**

| Name        | Sequence                 |
|-------------|--------------------------|
| Slc2a7 F1   | ACAAAGAGATAGGGACACCTCTGC |
| Slc2a7 R1   | GGACCTGAAAGACAGGACCCC    |
| Syncrip F1  | TTCGGCCGCCATTTTACAAC     |
| Syncrip R1  | CCATGGGCTCTTCAGTACCA     |
| Tlr12 F1    | GAGGGAGTACAGCCCTCAGA     |
| Tlr12 R1    | AGGGAACCCCTAGCAGAGAG     |
| Tmem132e F1 | ATCTCTACACCCTCGGACCC     |
| Tmem132e R1 | TAGGGCTAGCTGAGTTCCC      |
| Unc5a F1    | ACCATGGAGGTCCGGATCAA     |
| Unc5a F2    | GCGACAAGGTAGCACAAATGC    |
| Vmn2r20 F1  | TGTCCAGAGGGAGAGATTGC     |
| Vmn2r20 R1  | GACAATGGGTGTGTCCCAGT     |
| Vmn2r21 F1  | CCATGTCCAGAGGGAGAGGT     |
| Vmn2r21 R1  | GACAATGGGTGTGTCCCAGT     |

**Mus qChIP Primers**

| Name         | Sequence              |
|--------------|-----------------------|
| cFos F       | GCTGCGTACTTGCTTCTCCT  |
| cFos R       | AACATTCGCACCTGATTCAA  |
| FosB -1250 F | ATGGGACTCAGGTTGTCAGG  |
| FosB -1250 R | AGCCAGGGCTACACAGAGAA  |
| FosB -500 F  | GAGTTGCACCTTCTCCAACC  |
| FosB -500 R  | GGCCCAGTGTTTGTGGTA    |
| FosB -250 F  | ATGGCTAATTGCGTACAGG   |
| FosB -250 R  | ACCTCCCAAACCTCTCCCTTC |
| FosB +1 F    | GCTCCCGGTTTCATTATAA   |
| FosB +1 R    | GCAAAAAGGAAACCCACAAA  |

**Hu qChIP Primers**

| Name   | Sequence             |
|--------|----------------------|
| FosB F | CTTTGTCTCCGGGTGGATTA |
| FosB R | TTCTGTCTGATTGCTGTG   |

**Mus Bisulfite Sequencing Primers**

|   |                          |
|---|--------------------------|
| F | TGAATTATTTTGTGGGGTTGATAT |
| R | ATTAAAAACCTCTCCTTCCCCTTA |

**Supplementary Table 2**  
**FosB-ZFP35 Off-Target Sites**

| Gene Name   | Refseq           | Distance<br>to TSS | Motif Sequence             | No.      |           |                    |
|-------------|------------------|--------------------|----------------------------|----------|-----------|--------------------|
|             |                  |                    |                            | Mismatch | ZFP35-NFD | ZFP35-p65          |
| <b>Fosb</b> | <b>NM_008036</b> | <b>-215.5</b>      | <b>GATCCCCTCCCGCGAAGCC</b> | <b>0</b> | <b>ns</b> | <b>upregulated</b> |
| Ankrd52     | NM_172790        | 354.5              | GAGCCCCTCCAGCGACGCC        | 3        | ns        | ns                 |
| Cacnb3      | NM_007581        | 124.5              | GACCCCCTCCCGGGAAGAc        | 3        | ns        | ns                 |
| Ctbs        | NM_028836        | 2645.5             | GGTCCCCTCCCATGAAGCC        | 3        | ns        | ns                 |
| Cux2        | NM_007804        | -2559.5            | GCTCCCCTCGCGCGAGGCC        | 3        | nd        | nd                 |
| D15Wsu169e  | NM_001168288     | 801.5              | GAGGCCCTGCCGCGAAGCC        | 3        | ns        | ns                 |
| Dip2b       | NM_001159361     | 333.5              | GCTCCCCACCCGCGAAGCG        | 3        | ns        | ns                 |
| Fsd1l       | NM_176966        | 392.5              | GATCCCCCACCGGAGGCC         | 3        | ns        | ns                 |
| Gnai1       | NM_010305        | 65.5               | GATCCGCGCCCGCAATCC         | 3        | ns        | ns                 |
| Hcfc2       | NM_001081218     | -41.5              | GAGCCCCTCCCGCCAACCC        | 3        | ns        | ns                 |
| Hic2        | NM_178922        | 733.5              | GACCCCCTCCCCCAAGCC         | 3        | ns        | ns                 |
| Kcnt1       | NM_175462        | 215.5              | AAGCCCCTCCCGCGCAGCC        | 3        | ns        | ns                 |
| Mef2b       | NM_008578        | -50.5              | GATGCCTTCCCGCGCAGCC        | 3        | nd        | nd                 |
| Myl7        | NM_022879        | 1332.5             | GATCCCCTGCCGCGAGGCC        | 2        | nd        | nd                 |
| Ofcc1       | NM_172143        | 1511.5             | GCTCCCCTCCCTCGTAGCC        | 3        | nd        | nd                 |
| Rps6ka5     | NM_153587        | 372.5              | ATTCCCCGCCCGCGAAgcc        | 3        | ns        | ns                 |
| Sardh       | NM_138665        | -799.5             | GTTCCCCACCCCGAAGCC         | 3        | ns        | ns                 |
| Slc2a7      | NM_001085529     | -1338.5            | GATCTCCTCACGCGAAGTC        | 3        | ns        | ns                 |
| Syncrip     | NM_019666        | -594.5             | GCTCCCCTCCCCCGCAGCC        | 3        | ns        | ns                 |
| Tlr12       | NM_205823        | -12.5              | TTTCCCCTCCCTCGAAGCC        | 3        | ns        | ns                 |
| Tmem132e    | NM_023438        | 2611.5             | TCTCCCCTCCCCGAAGCC         | 3        | ns        | ns                 |
| Unc5a       | NM_153131        | 1317.5             | GATCACCTCCCGGGAAGCA        | 3        | ns        | ns                 |
| Vmn2r20     | NM_001104634     | -2738.5            | GATCCCATCCCACTAGCC         | 3        | nd        | nd                 |
| Vmn2r21     | NM_001104635     | -2738.5            | GATCCCATCCCACTAGCC         | 3        | nd        | nd                 |

nd not determined (no cDNA detected in NAc tissue)  
ns not significant, see Extended Data Fig. 3b

**Supplementary Table 3. Extended statistics.**

| <b>FIGURE 1d</b>     | <b>t</b> | <b>df</b> | <b>Sig. (2-tailed)</b> | <b>n =</b> | <b>GFP n =</b> |
|----------------------|----------|-----------|------------------------|------------|----------------|
| FOSB_fosb_zfp25_p65  | 0.178    | 8         | 0.863                  | 5          | 5              |
| dFOSB_fosb_zfp25_p65 | 0.541    | 8         | 0.603                  | 5          | 5              |
| FOSB_fosb_zfp25_G9a  | -0.865   | 7         | 0.415                  | 4          | 5              |
| dFOSB_fosb_zfp25_G9a | -0.275   | 7         | 0.791                  | 4          | 5              |
| FOSB_fosb_zfp35_p65  | 2.376    | 7         | 0.049                  | 4          | 5              |
| dFOSB_fosb_zfp35_p65 | 3.828    | 7         | 0.006                  | 4          | 5              |
| FOSB_fosb_zfp35_G9a  | -4.842   | 6         | 0.003                  | 5          | 3              |
| dFOSB_fosb_zfp35_G9a | -3.38    | 6         | 0.015                  | 5          | 3              |
| FOSB_fosb_zfp35_NFD  | 0.312    | 8         | 0.763                  | 5          | 5              |
| dFOSB_fosb_zfp35_NFD | 0.96     | 8         | 0.365                  | 5          | 5              |
| FOSB_fosb_zfp61_p65  | 0.444    | 7         | 0.670                  | 4          | 5              |
| dFOSB_fosb_zfp61_p65 | 2.097    | 7         | 0.074                  | 4          | 5              |
| FOSB_fosb_zfp61_G9a  | -2.997   | 8         | 0.017                  | 5          | 5              |
| dFOSB_fosb_zfp61_G9a | -2.364   | 8         | 0.046                  | 5          | 5              |
| FOSB_fosb_zfp61_nfd  | -2.404   | 7         | 0.047                  | 4          | 5              |
| dFOSB_fosb_zfp61_nfd | -2.176   | 7         | 0.066                  | 4          | 5              |
| FOSB_p65             | 0.151    | 7         | 0.884                  | 5          | 4              |
| dFOSB_p65            | 0.802    | 7         | 0.449                  | 5          | 4              |
| FOSB_klf4_zfp_p65    | -0.479   | 8         | 0.645                  | 5          | 5              |
| dFOSB_klf4_zfp_p65   | -0.193   | 8         | 0.852                  | 5          | 5              |
| FOSB_vegf_zfp_G9a    | -0.248   | 7         | 0.811                  | 5          | 4              |
| dFOSB_vegf_zfp_G9a   | 0.224    | 7         | 0.829                  | 5          | 4              |

| <b>FIGURE 2b</b>  | <b>t</b> | <b>df</b> | <b>Sig. (2-tailed)</b> | <b>GFP n=</b> | <b>NFD n=</b> |
|-------------------|----------|-----------|------------------------|---------------|---------------|
| <b>GFP TO NFD</b> |          |           |                        |               |               |
| FosB              | 0.378    | 8         | 0.715                  | 5             | 5             |
| DFosB             | -0.516   | 8         | 0.619                  | 5             | 5             |
| Ankrd52           | 1.492    | 8         | 0.174                  | 5             | 5             |
| Cacnb3            | 1.112    | 8         | 0.298                  | 5             | 5             |
| Ctbs              | -0.949   | 7         | 0.374                  | 4             | 5             |
| D15Wsu169e        | -0.174   | 8         | 0.866                  | 5             | 5             |
| Dip2b             | -0.615   | 8         | 0.555                  | 5             | 5             |
| Fsd1l             | 0.523    | 7         | 0.617                  | 4             | 5             |
| Gnai1             | 0.038    | 8         | 0.971                  | 5             | 5             |
| Hcfc2             | -0.516   | 8         | 0.619                  | 5             | 5             |
| Hic2              | -0.426   | 7         | 0.683                  | 4             | 5             |
| Kcnt1             | -0.772   | 8         | 0.462                  | 5             | 5             |
| Prprt1            | -0.451   | 8         | 0.664                  | 5             | 5             |
| Prprt2            | -0.309   | 8         | 0.765                  | 5             | 5             |
| Pth1r             | -0.583   | 8         | 0.576                  | 5             | 5             |
| Ptprn2            | -0.507   | 8         | 0.626                  | 5             | 5             |
| Pygo1             | -0.157   | 8         | 0.879                  | 5             | 5             |
| Rps6ka5           | -0.461   | 8         | 0.657                  | 5             | 5             |
| Sardh             | -0.325   | 8         | 0.754                  | 5             | 5             |
| Slc2a7            | -0.272   | 8         | 0.793                  | 5             | 5             |
| Syncrip           | -0.289   | 8         | 0.78                   | 5             | 5             |
| Tlr12             | 0.601    | 8         | 0.565                  | 5             | 5             |
| Tmem132e          | 1.261    | 7         | 0.248                  | 4             | 5             |
| Unc5a             | -0.387   | 7         | 0.71                   | 4             | 5             |

| <b>GFP TO p65</b> | <b>t</b> | <b>df</b> | <b>Sig. (2-tailed)</b> | <b>GFP n=</b> | <b>p65 n=</b> |
|-------------------|----------|-----------|------------------------|---------------|---------------|
| FosB              | -4.731   | 7         | 0.002                  | 5             | 4             |
| DFosB             | -4.83    | 7         | 0.002                  | 5             | 4             |
| Ankrd52           | -1.648   | 7         | 0.143                  | 5             | 4             |
| Cacnb3            | -0.215   | 7         | 0.836                  | 5             | 4             |
| Ctbs              | 0.878    | 6         | 0.414                  | 4             | 4             |
| D15Wsu169e        | -0.572   | 7         | 0.585                  | 5             | 4             |
| Dip2b             | -0.704   | 7         | 0.504                  | 5             | 4             |
| Fsd1l             | -0.446   | 6         | 0.671                  | 4             | 4             |
| Gnai1             | 0.13     | 7         | 0.901                  | 5             | 4             |
| Hcfc2             | -0.674   | 7         | 0.522                  | 5             | 4             |
| Hic2              | 0.019    | 6         | 0.985                  | 4             | 4             |
| Kcnt1             | -0.504   | 7         | 0.63                   | 5             | 4             |
| Prrt1             | 0.06     | 7         | 0.954                  | 5             | 4             |
| Prrt2             | 0.007    | 7         | 0.995                  | 5             | 4             |
| Pth1r             | -0.06    | 7         | 0.954                  | 5             | 4             |
| Ptprn2            | 0.006    | 7         | 0.996                  | 5             | 4             |
| Pygo1             | 0.011    | 7         | 0.991                  | 5             | 4             |
| Rps6ka5           | -0.64    | 7         | 0.543                  | 5             | 4             |
| Sardh             | 0.093    | 7         | 0.928                  | 5             | 4             |
| Slc2a7            | -0.208   | 7         | 0.841                  | 5             | 4             |
| Syncrip           | -0.799   | 7         | 0.45                   | 5             | 4             |
| Tlr12             | 0.085    | 7         | 0.934                  | 5             | 4             |
| Tmem132e          | -0.217   | 6         | 0.835                  | 4             | 4             |
| Unc5a             | -0.435   | 6         | 0.679                  | 4             | 4             |
| <b>GFP to G9a</b> | <b>t</b> | <b>df</b> | <b>Sig. (2-tailed)</b> | <b>GFP n=</b> | <b>G9a n=</b> |
| FosB              | 2.399    | 8         | 0.043                  | 5             | 5             |
| DFosB             | 2.876    | 8         | 0.021                  | 5             | 5             |
| Ankrd52           | 1.097    | 8         | 0.304                  | 5             | 5             |
| Cacnb3            | 0.822    | 8         | 0.435                  | 5             | 5             |
| Ctbs              | -0.541   | 7         | 0.605                  | 4             | 5             |
| D15Wsu169e        | 0.323    | 8         | 0.755                  | 5             | 5             |
| Dip2b             | 0.701    | 8         | 0.503                  | 5             | 5             |
| Fsd1l             | -0.132   | 7         | 0.899                  | 4             | 5             |
| Gnai1             | -0.166   | 8         | 0.873                  | 5             | 5             |
| Hcfc2             | 0.579    | 8         | 0.578                  | 5             | 5             |
| Hic2              | 0.095    | 7         | 0.927                  | 4             | 5             |
| Kcnt1             | -0.386   | 8         | 0.71                   | 5             | 5             |
| Prrt1             | -1.698   | 8         | 0.128                  | 5             | 5             |
| Prrt2             | -0.332   | 8         | 0.748                  | 5             | 5             |
| Pth1r             | 0.053    | 8         | 0.959                  | 5             | 5             |
| Ptprn2            | 0.246    | 8         | 0.812                  | 5             | 5             |
| Pygo1             | 0.389    | 8         | 0.707                  | 5             | 5             |
| Rps6ka5           | 0.434    | 8         | 0.676                  | 5             | 5             |
| Sardh             | -0.198   | 8         | 0.848                  | 5             | 5             |
| Slc2a7            | 0.522    | 8         | 0.616                  | 5             | 5             |
| Syncrip           | -1.05    | 8         | 0.325                  | 5             | 5             |
| Tlr12             | 0.194    | 8         | 0.851                  | 5             | 5             |
| Tmem132e          | -0.748   | 7         | 0.479                  | 4             | 5             |
| Unc5a             | 0.561    | 7         | 0.592                  | 4             | 5             |

**SUPP FIGURE 1**

| <b>FosB</b>  | <b>t</b> | <b>df</b> | <b>Sig. (2-tailed)</b> | <b>n =</b> | <b>mock n =</b> |
|--------------|----------|-----------|------------------------|------------|-----------------|
| FosB_1_NFD   | 1.868    | 17        | 0.079                  | 6          | 13              |
| FosB_1_p65   | -0.666   | 14        | 0.516                  | 3          | 13              |
| FosB_1_G9a   | 1.958    | 17        | 0.067                  | 6          | 13              |
| FosB_14_NFD  | 1.36     | 20        | 0.189                  | 9          | 13              |
| FosB_14_p65  | -0.192   | 17        | 0.85                   | 6          | 13              |
| FosB_14_G9a  | 4.142    | 17        | 0.001                  | 6          | 13              |
| FosB_25_NFD  | 0.273    | 23        | 0.787                  | 12         | 13              |
| FosB_25_p65  | 2.705    | 20        | 0.014                  | 9          | 13              |
| FosB_25_G9a  | 2.897    | 20        | 0.009                  | 9          | 13              |
| FosB_29_NFD  | 1.186    | 20        | 0.25                   | 9          | 13              |
| FosB_29_p65  | 0.858    | 17        | 0.403                  | 6          | 13              |
| FosB_29_G9a  | 2.082    | 17        | 0.053                  | 6          | 13              |
| FosB_31_NFD  | 2.251    | 20        | 0.036                  | 9          | 13              |
| FosB_31_p65  | 1.106    | 17        | 0.284                  | 6          | 13              |
| FosB_31_G9a  | 2.218    | 17        | 0.04                   | 6          | 13              |
| FosB_35_NFD  | 2.975    | 22        | 0.007                  | 11         | 13              |
| FosB_35_p65  | 4.208    | 19        | 0                      | 8          | 13              |
| FosB_35_G9a  | 4.716    | 19        | 0                      | 8          | 13              |
| FosB_37_NFD  | 1.807    | 20        | 0.086                  | 9          | 13              |
| FosB_37_p65  | 1.317    | 17        | 0.205                  | 6          | 13              |
| FosB_37_G9a  | 1.459    | 17        | 0.163                  | 6          | 13              |
| FosB_54_NFD  | 1.742    | 20        | 0.097                  | 9          | 13              |
| FosB_54_p65  | 3.132    | 17        | 0.006                  | 6          | 13              |
| FosB_54_G9a  | 2.595    | 17        | 0.019                  | 6          | 13              |
| FosB_61_NFD  | 0.231    | 17        | 0.82                   | 6          | 13              |
| FosB_61_p65  | -0.616   | 14        | 0.548                  | 3          | 13              |
| FosB_61_G9a  | 1.031    | 17        | 0.317                  | 6          | 13              |
| <b>DFosB</b> | <b>t</b> | <b>df</b> | <b>Sig. (2-tailed)</b> | <b>n =</b> | <b>mock n =</b> |
| FosB_1_NFD   | -2.337   | 17        | 0.032                  | 6          | 13              |
| FosB_1_p65   | -0.281   | 14        | 0.783                  | 3          | 13              |
| FosB_1_G9a   | 0.353    | 17        | 0.728                  | 6          | 13              |
| FosB_14_NFD  | 0        | 20        | 1                      | 9          | 13              |
| FosB_14_p65  | 11.495   | 17        | 0.00                   | 6          | 13              |
| FosB_14_G9a  | -0.85    | 17        | 0.407                  | 6          | 13              |
| FosB_25_NFD  | 1.77     | 23        | 0.090                  | 12         | 13              |
| FosB_25_p65  | 2.569    | 20        | 0.018                  | 9          | 13              |
| FosB_25_G9a  | 2.72     | 20        | 0.013                  | 9          | 13              |
| FosB_29_NFD  | 3.658    | 20        | 0.002                  | 9          | 13              |
| FosB_29_p65  | 1.961    | 17        | 0.067                  | 6          | 13              |
| FosB_29_G9a  | 4.553    | 17        | 0.000                  | 6          | 13              |
| FosB_31_NFD  | -0.107   | 17        | 0.916                  | 6          | 13              |
| FosB_31_p65  | 2.833    | 20        | 0.010                  | 9          | 13              |
| FosB_31_G9a  | 2.278    | 17        | 0.036                  | 6          | 13              |
| FosB_35_NFD  | 2.13     | 22        | 0.045                  | 11         | 13              |
| FosB_35_p65  | 2.904    | 19        | 0.009                  | 8          | 13              |
| FosB_35_G9a  | 2.584    | 19        | 0.018                  | 8          | 13              |
| FosB_37_NFD  | 1.223    | 20        | 0.236                  | 9          | 13              |
| FosB_37_p65  | 2.241    | 17        | 0.039                  | 6          | 13              |
| FosB_37_G9a  | 3.375    | 17        | 0.004                  | 6          | 13              |
| FosB_54_NFD  | 2.46     | 20        | 0.023                  | 9          | 13              |
| FosB_54_p65  | 3.089    | 17        | 0.007                  | 6          | 13              |
| FosB_54_G9a  | 2.791    | 17        | 0.013                  | 6          | 13              |
| FosB_61_NFD  | 3.085    | 17        | 0.007                  | 6          | 13              |
| FosB_61_p65  | 18.966   | 14        | 0.00                   | 3          | 13              |
| FosB_61_G9a  | 5.545    | 17        | 0.00                   | 6          | 13              |



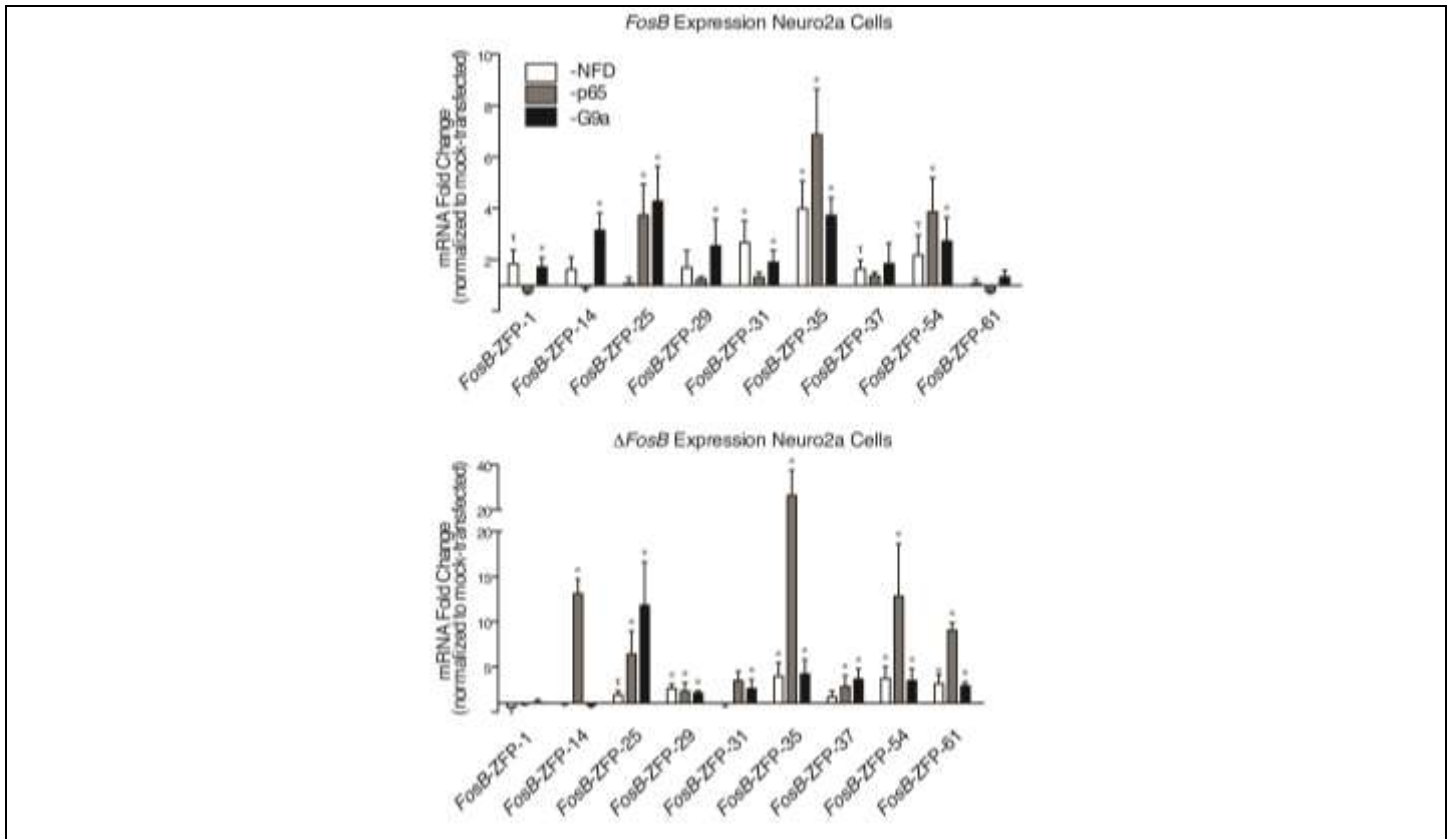

Supplementary Figure 1

**A suite of *FosB*-ZFPs bidirectionally regulate *FosB* expression in vitro.**

**(a)** *FosB*/ $\Delta$ *FosB* mRNA was significantly induced by several *FosB*-ZFP-p65 and -G9a constructs expressed in N2a cells and harvested after 48 hours. *FosB*-ZFP-NFD constructs activated gene expression to a lesser extent or not at all. Data are normalized to mock transfected cells. Complete statistics are available in Supplementary Table 3. Student's unpaired t-test:  $\square P < 0.05$ ,  $\square P < 0.10$ . Data are presented as mean  $\pm$  s.e.m.

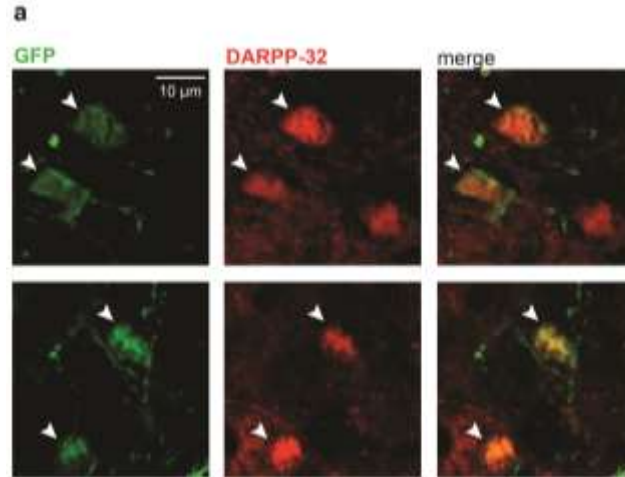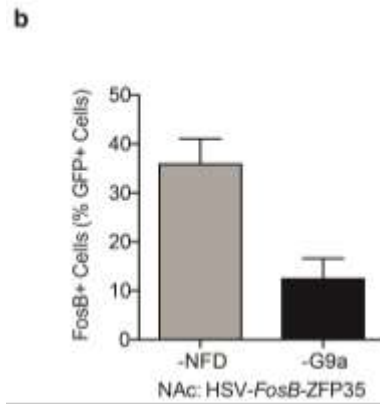

### Supplementary Figure 2

HSV-ZFPs specifically infect neurons in NAc and inhibit basal *FosB* expression.

**(a)** HSV-GFP specifically infects DARPP-32 positive neurons in the NAc. White arrows indicate double labeled cells. **(b)** NAc injection of HSV-*FosB*-ZFP35-G9a repressed expression of FosB/ $\Delta$ FosB in HSV infected (GFP+) cells [ $t_{13}=3.55$ ,  $*P=0.033$ ;  $n=7, 8$ ] compared to HSV-*FosB*-ZFP35-G9a (72 hours post HSV injection). Data are presented as mean  $\pm$  s.e.m.

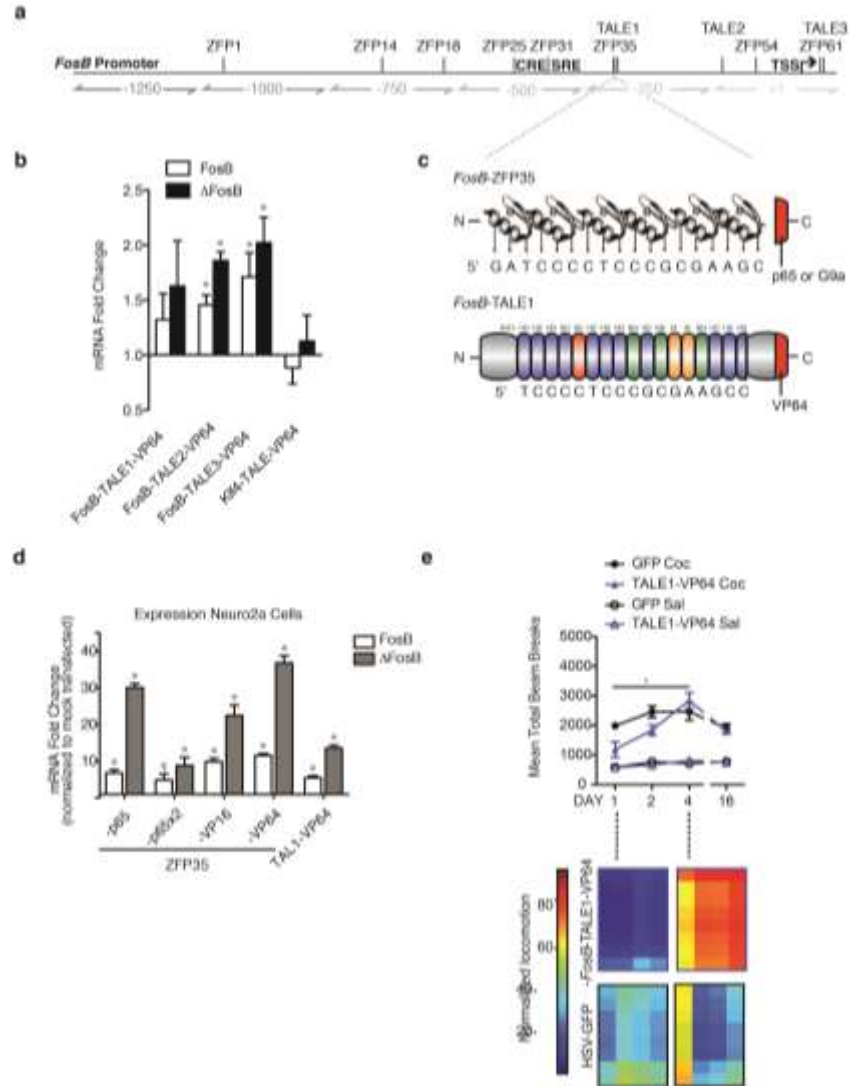

### Supplementary Figure 3

Regulation of *FosB* expression and reward behavior by *FosB*-TALEs and a suite of additional catalytic domains fused to *FosB*-ZFP35.

**(a)** Locations of *FosB*-ZFP and -TALE binding relative to the *FosB* TSS. The location of functional SRF and CREB sites are shown.

**(b)** *FosB*/ $\Delta$ *FosB* mRNA expression in the NAc was significantly induced by HSV-*FosB*-TALE2-VP64 [*FosB*:  $t_8=3.03$ ,  $*P=0.016$ ;  $\Delta$ *FosB*:  $t_8=6.40$ ,  $*P=0.000$ ;  $n=5$ ], and -*FosB*-TALE3-VP64 [*FosB*:  $t_8=2.79$ ,  $*P=0.023$ ;  $\Delta$ *FosB*:  $t_8=4.01$ ,  $*P=0.004$ ;  $n=5$ ] compared to control virus.

**(c)** The binding sites of the 6-finger ZFP35 and 17-RVD (repeat variable diresidue) TALE1 recognize the *FosB* promoter at overlapping sites approximately 250 bp upstream from the *FosB* TSS.

**(d)** *FosB*-ZFP35-p65 [*FosB*:  $t_4=5.91$ ,  $*P=0.004$ ;  $\Delta$ *FosB*:  $t_4=26.11$ ,  $*P=0.000$ ;  $n=3$ ], -p65x2 [*FosB*:  $t_4=2.30$ ,  $*P=0.000$ ;  $\Delta$ *FosB*:  $t_4=3.46$ ,  $*P=0.026$ ;  $n=3$ ], -VP16 [*FosB*:  $t_4=9.04$ ,  $*P=0.001$ ;  $\Delta$ *FosB*:  $t_4=7.45$ ,  $*P=0.002$ ;  $n=3$ ], and -VP64 [*FosB*:  $t_4=19.40$ ,  $*P=0.001$ ;  $\Delta$ *FosB*:  $t_4=7.45$ ,  $*P=0.001$ ;  $n=3$ ] and *FosB*-TALE1-VP64 [*FosB*:  $t_4=6.80$ ,  $*P=0.002$ ;  $\Delta$ *FosB*:  $t_4=15.17$ ,  $*P=0.000$ ;  $n=3$ ] activate *FosB*/ $\Delta$ *FosB* mRNA levels when expressed in Neuro2a cells and harvested after 48 hours. Data are normalized to mock transfected cells.

**(e)** HSV-*FosB*-TALE1-VP64 in NAc sensitizes cocaine-induced hyperactivity over time. There is a significant interaction between day, cocaine treatment, and virus [ $F(3,32)=3.42$ ,  $*P=0.029$ ]. TALE1-VP64 sensitizes the effect of cocaine on locomotor activity [main effect of day among TALE1-VP64 [ $F(3,35)=9.92$ ,  $*P=0.000$ ,  $n=10$ ], but not GFP control [ $F(3,36)=2.05$ ,  $P=0.126$ ,  $n=9$ ]. HSV-GFP data are the same as in Fig. 4d-e. Heat maps show representative locomotor data within the chamber for mice over the course of repeated cocaine exposure. Data are presented as mean  $\pm$  s.e.m.

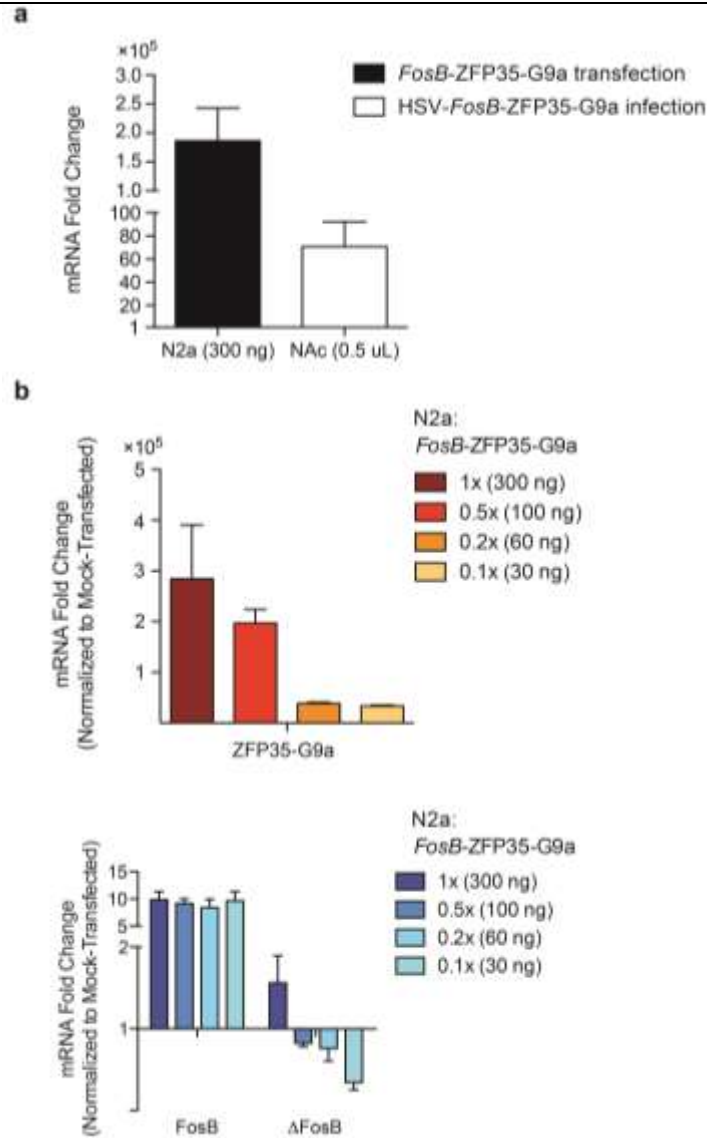

#### Supplementary Figure 4

Differential regulation by *FosB*-ZFPs in vitro and in vivo.

**(a)** Expression of *FosB*-ZFP35-G9a differs between N2a cells and NAc [ $t_6=4.50$ ,  $*P=0.004$ ;  $n=3,5$ ]. **(b)** Titration of the amount of *FosB*-ZFP35-G9a expression in N2a cells leads to a reduction in the amount of induced mRNA expression of  $\Delta$ FosB but not FosB. Using a 2-tailed Pearson correlation, we found a significant correlation between  $\mu$ g of transfected DNA and mRNA fold change of  $\Delta$ FosB [ $R_{12}=0.83$ ,  $*P=0.001$ ] but not FosB [ $R_{12}=.66$ ,  $P=0.665$ ]. Data are presented as mean  $\pm$  s.e.m.

anti-FosB

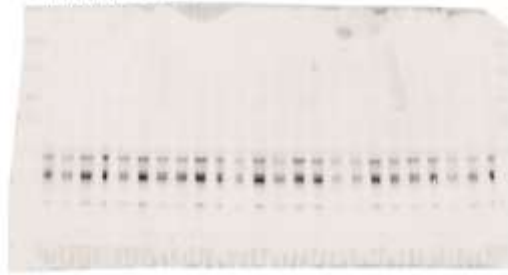

anti-Actin

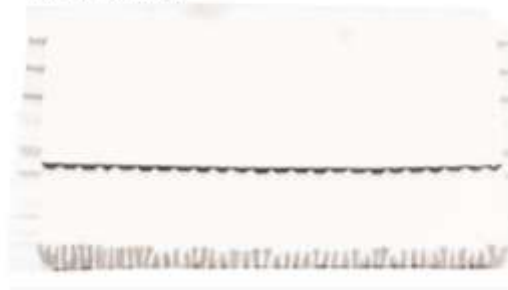

**Supplementary Figure 5**

Full blots of experiment shown in Figure 1e.
